# Supplementary material
Source: publisher figshare collection journal article supplement (https://plos.figshare.com/articles/dataset/_/7575212)
Supplement: Supplementary file 1 [file 1]

Archive with 9 entries (9 files):
- ppat.1007515.s001.docx
- ppat.1007515.s002.tif
- ppat.1007515.s003.tif
- ppat.1007515.s004.tif
- ppat.1007515.s005.pdf
- ppat.1007515.s006.pdf
- ppat.1007515.s007.pdf
- ppat.1007515.s008.pdf
- ppat.1007515.s009.pdf
