# Supplementary material
Source: publisher figshare collection journal article supplement (https://plos.figshare.com/articles/dataset/_/7575212)

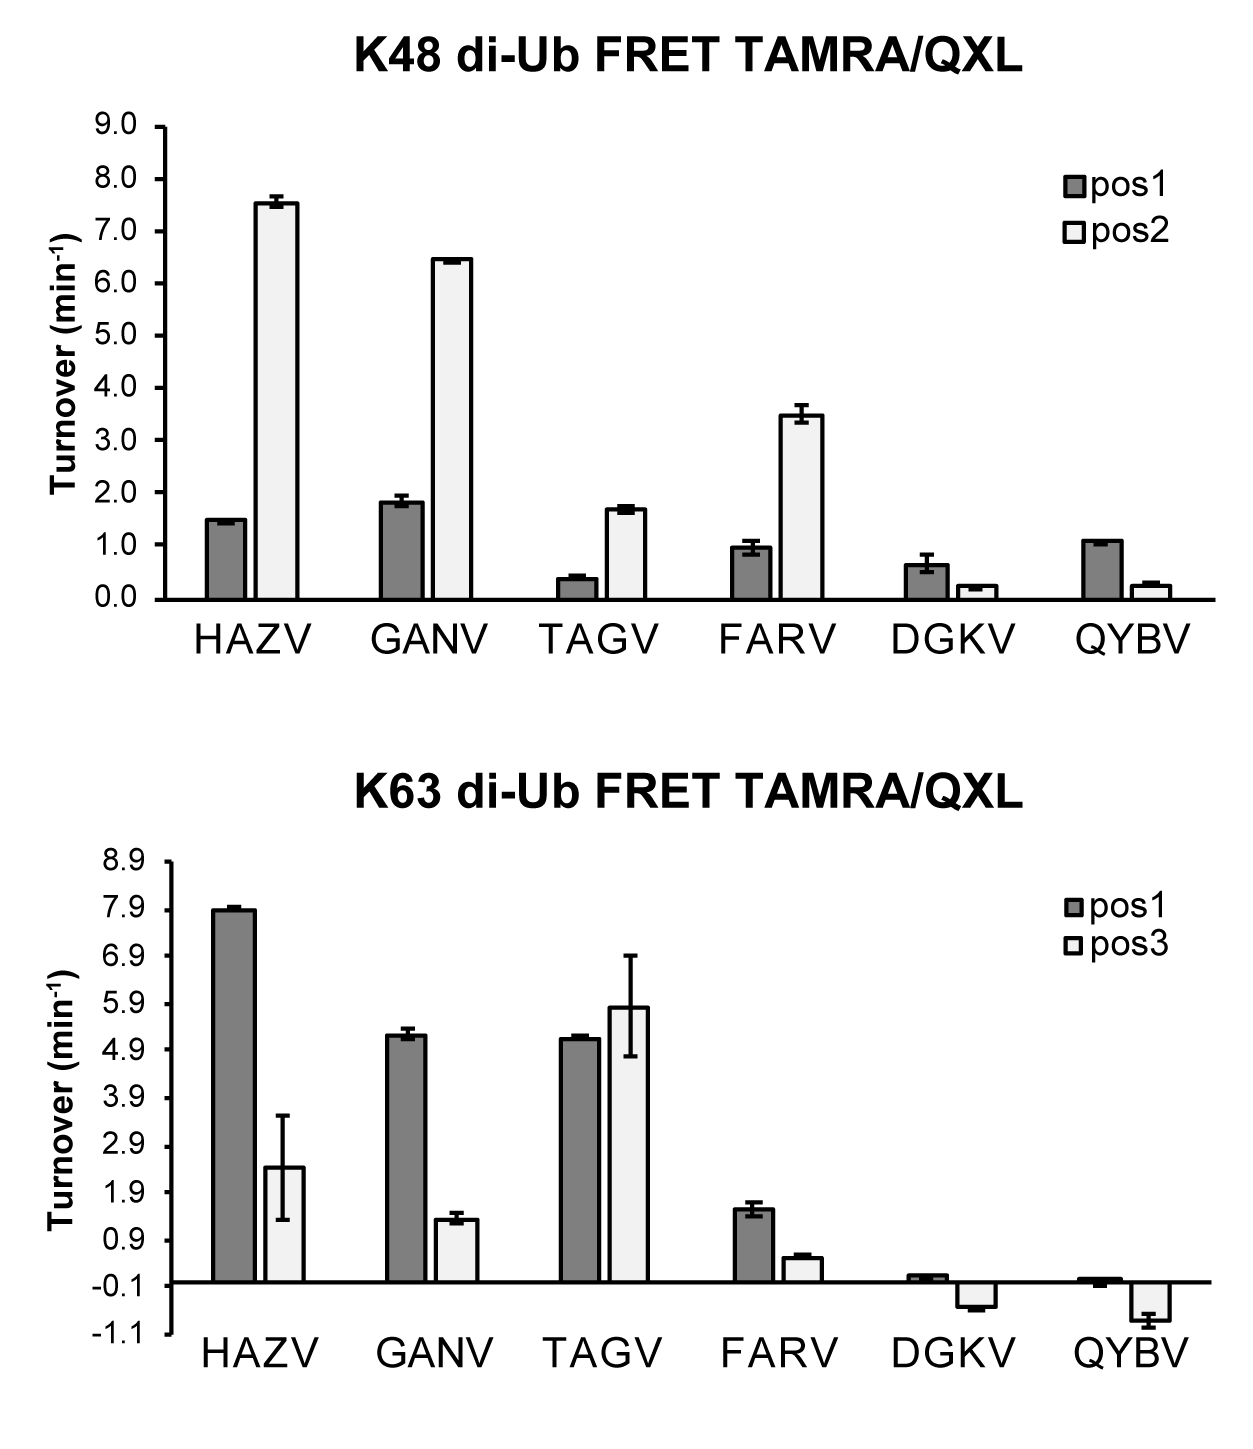

Supplement: Supplementary file 1 [file 1 › ppat.1007515.s002.tif]

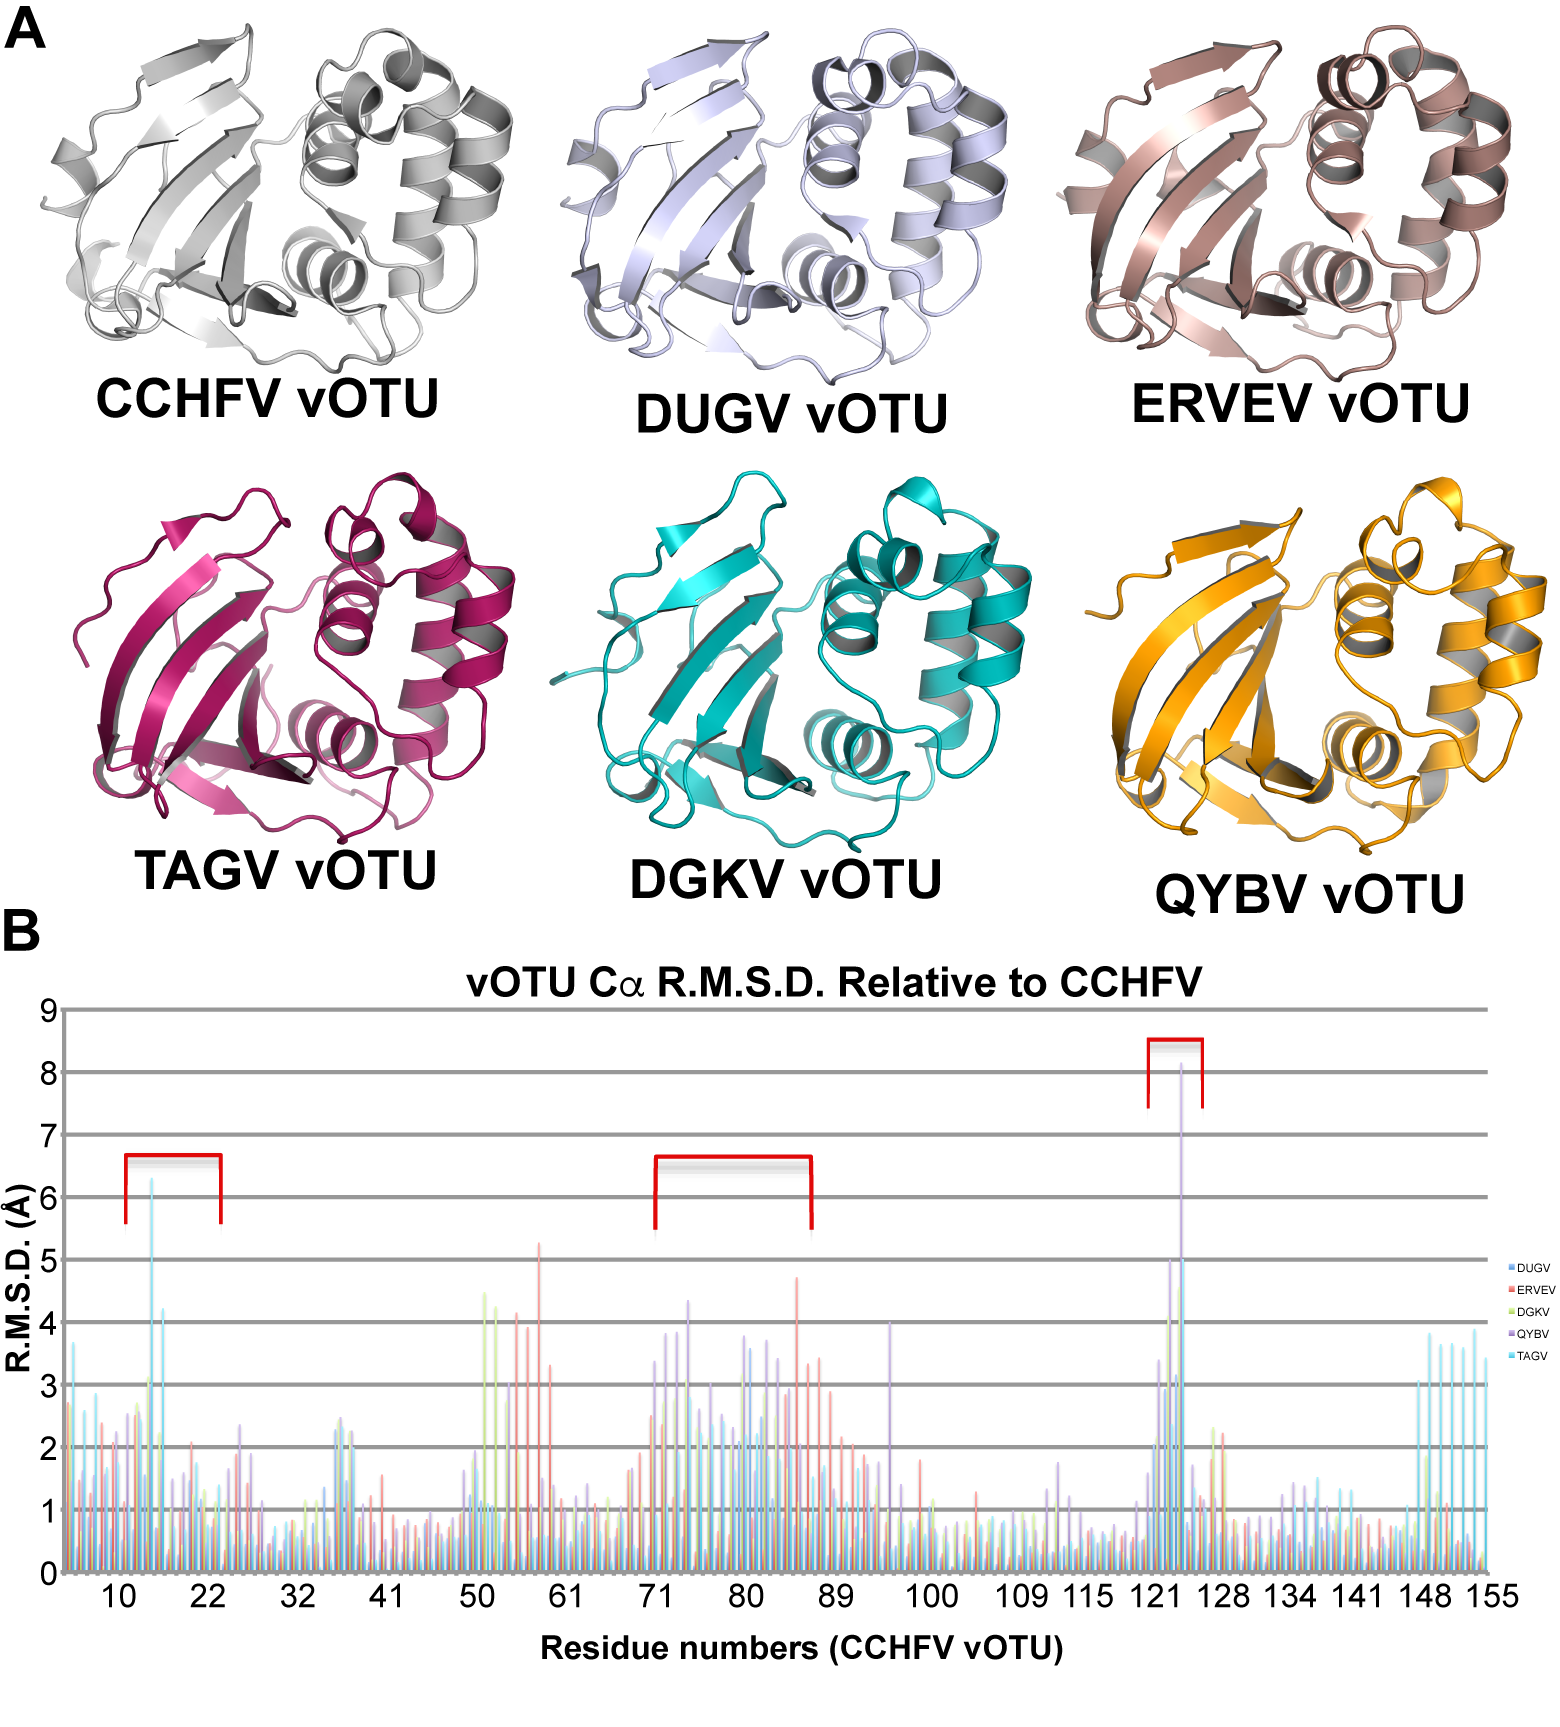

Supplement: Supplementary file 1 [file 1 › ppat.1007515.s003.tif]

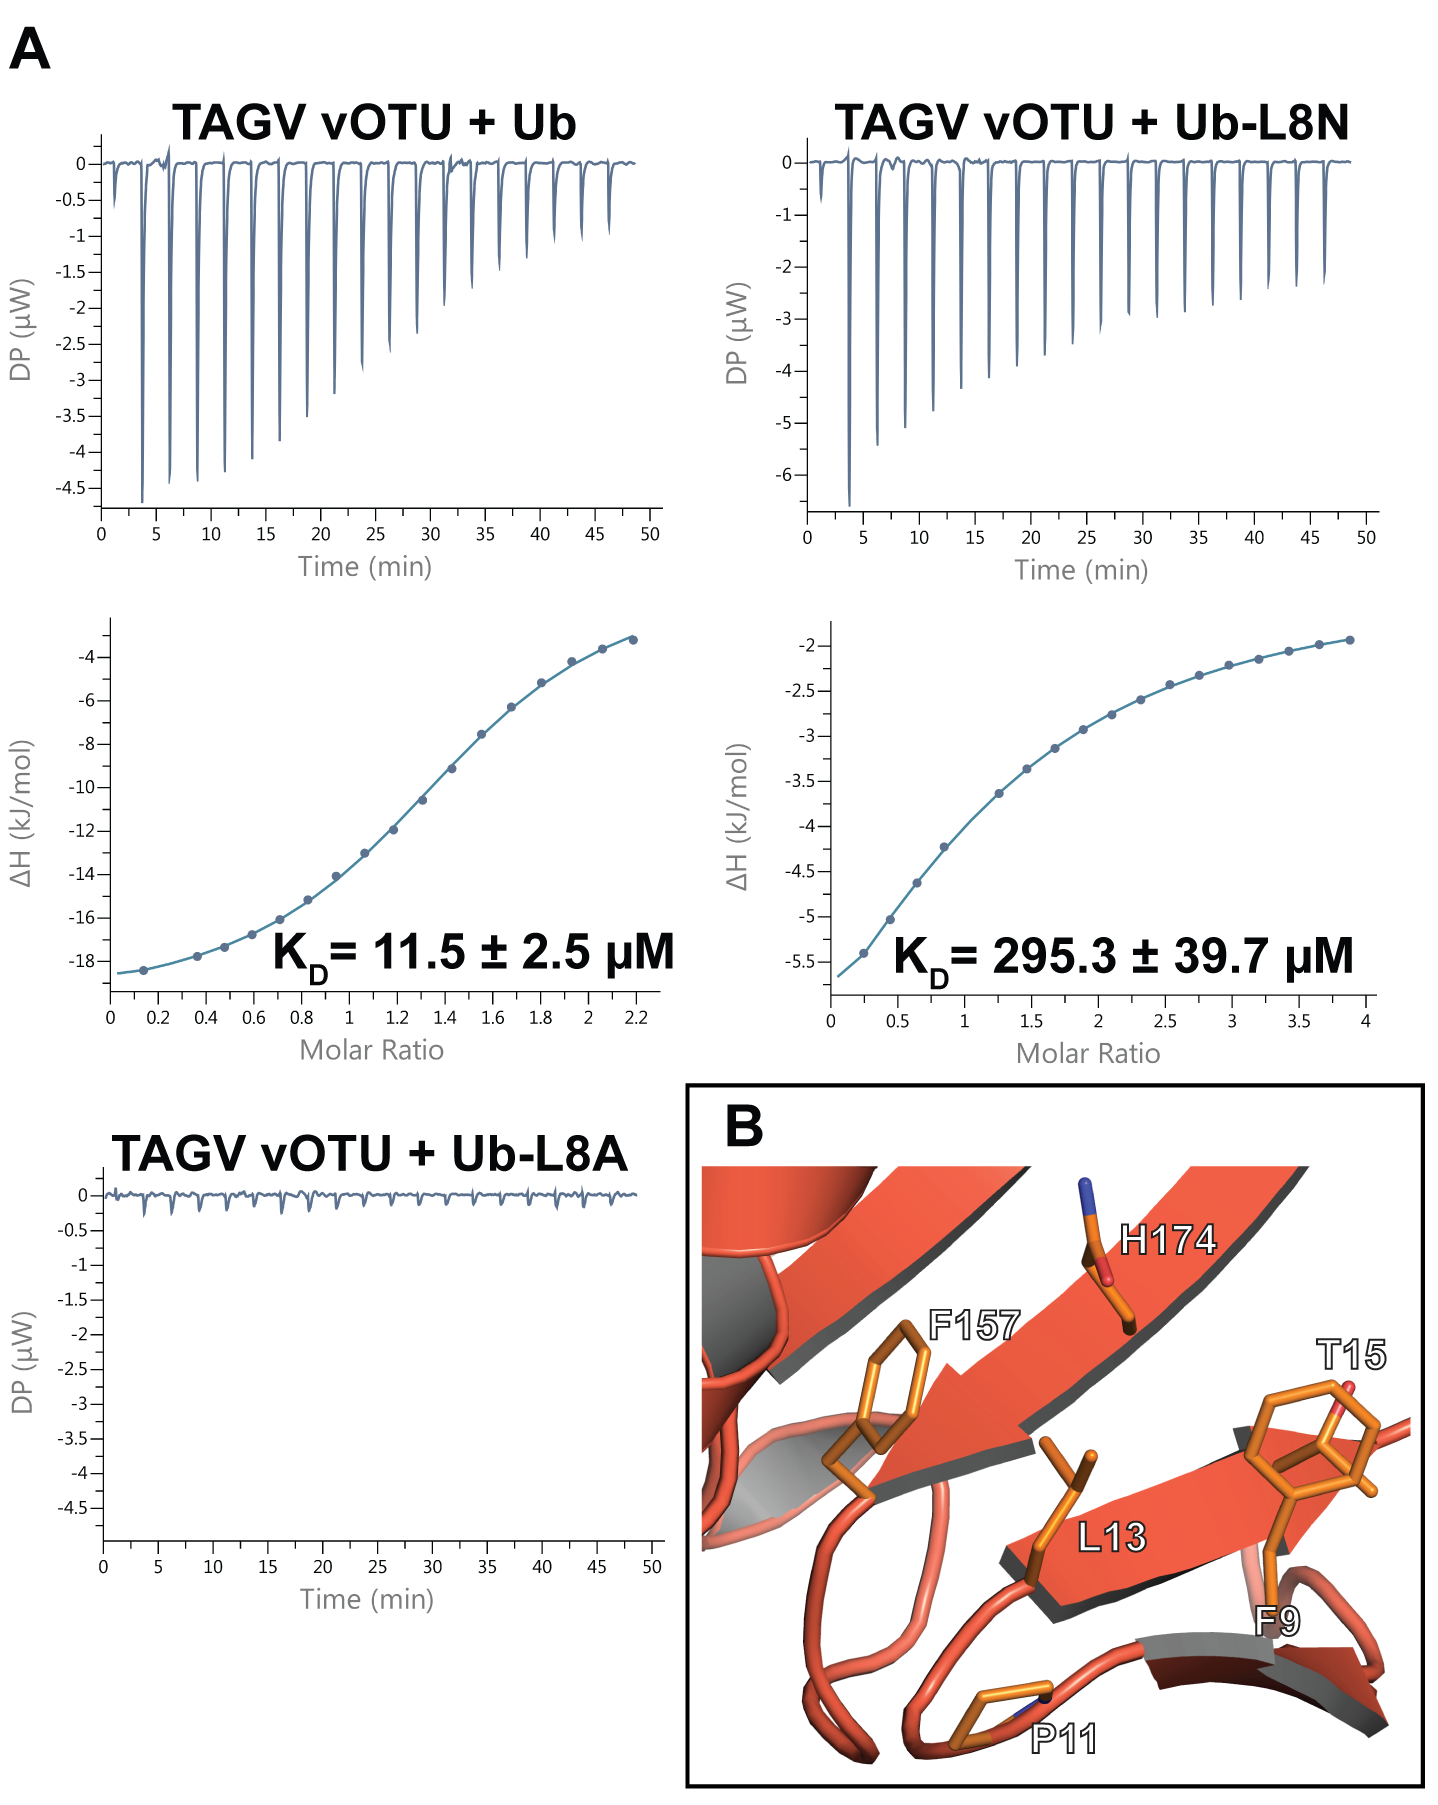

Supplement: Supplementary file 1 [file 1 › ppat.1007515.s004.tif]
